# Supplementary material
Source: PubMed Central journal article supplement (PMC3771526)
Supplement: NIHMS498641-supplement-Supplementary_data.pdf [file NIHMS498641-supplement-Supplementary_data.pdf]

===== README.TXT =====

All Authors: G. N. Sankin, F. Yuan, P. Zhong

Title: Pulsating tandem microbubble for localized and directional single cell membrane poration

Description:

Zhong\_movie1.mov is a QuickTime movie file for dynamics of tandem microbubble oscillation.

Zhong\_movie2.mov is a QuickTime movie file for dynamics of single microbubble oscillation and associated flow field visualized by uPIV

Zhong\_movie3.mov is a QuickTime movie file for dynamics of tandem microbubble oscillation and associated flow field visualized by uPIV

Zhong\_movie4.mov is a QuickTime movie file for localized membrane disruption with progressive uptake of Trypan blue

Total No. of Files: 5

Filenames:

Zhong\_movie1.mov, Zhong\_movie2.mov, Zhong\_movie3.mov, Zhong\_movie4.mov, README.TXT

Filetypes: QuickTime movie

Special Instructions:

Contact information:

Dr. Pei Zhong  
Department of Mechanical Engineering and Materials Science  
Duke University, Box 90300  
Durham, NC 27708-0300  
Email: pzhong@duke.edu  
Phone: 1+919-660-5336  
Fax: 1+919-660-8963

=====
